# Supplementary material
Source: MDPI journal article supplement (https://www.mdpi.com/2306-5710/9/3/62)
Supplement: s1 [file s1]

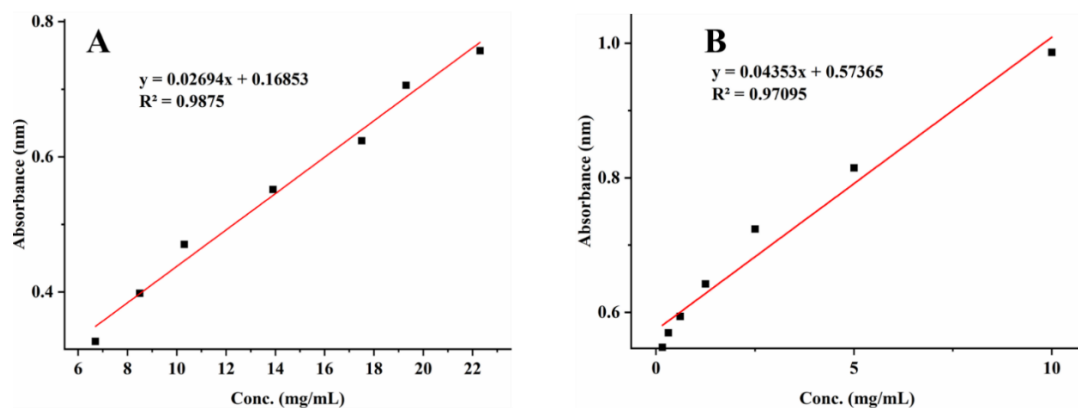

**Figure S1.** Standard curves for reducing sugar (A) and lactic acid (B).

**Supplementary Table S1** Analysis of variance, regression analysis, and optimal conditions for chickpea milk fermentation.

| Source                | Reducing sugar |          |          | Lactic acid |         |          | Cell viability index |         |          |
|-----------------------|----------------|----------|----------|-------------|---------|----------|----------------------|---------|----------|
|                       | Mean square    | f-value  | p-value  | Mean square | f-value | p-value  | Mean square          | f-value | p-value  |
| Model                 | 0.0071         | 6907.04  | < 0.0001 | 0.1685      | 77.34   | < 0.0001 | 0.0024               | 1022.87 | < 0.0001 |
| <b>Linear</b>         |                |          |          |             |         |          |                      |         |          |
| A: Start time         | 0.0023         | 2266.30  | < 0.0001 | 0.0224      | 10.28   | 0.0063   | 0.0055               | 2341.92 | < 0.0001 |
| B: Treatment duration | 0.0013         | 1295.21  | < 0.0001 | 0.1600      | 73.45   | < 0.0001 | 0.0027               | 1171.91 | < 0.0001 |
| C: Frequency          | 0.0137         | 13283.94 | < 0.0001 | 0.2737      | 125.63  | < 0.0001 | 0.0004               | 191.68  | < 0.0001 |
| D: Power density      | 0.0005         | 463.33   | < 0.0001 | 0.0099      | 4.55    | 0.0512   | 1.223e-06            | 0.52    | 0.48     |
| <b>Quadratic</b>      |                |          |          |             |         |          |                      |         |          |
| A <sup>2</sup>        | 0.0263         | 25579.00 | < 0.0001 | 0.1144      | 52.53   | < 0.0001 | 0.0031               | 1342.27 | < 0.0001 |
| B <sup>2</sup>        | 0.0038         | 3705.13  | < 0.0001 | 0.1551      | 71.19   | < 0.0001 | 0.0015               | 621.93  | < 0.0001 |

|                             |          |              |             |        |        |          |               |             |             |
|-----------------------------|----------|--------------|-------------|--------|--------|----------|---------------|-------------|-------------|
| C <sup>2</sup>              | 0.0013   | 1271.17      | <<br>0.0001 | 0.4693 | 215.41 | < 0.0001 | 0.0022        | 942.31      | <<br>0.0001 |
| D <sup>2</sup>              | 0.0011   | 1098.36      | <<br>0.0001 | 0.0575 | 26.39  | 0.0002   | 0.0029        | 1255.9<br>7 | <<br>0.0001 |
| <b>Interaction</b>          |          |              |             |        |        |          |               |             |             |
| A*B                         | 0.0001   | 95.34        | <<br>0.0001 | 0.2122 | 97.39  | < 0.0001 | 0.0041        | 1771.0<br>1 | <<br>0.0001 |
| A*C                         | 0.0023   | 2283.57      | <<br>0.0001 | 0.1181 | 54.21  | < 0.0001 | 0.0012        | 493.89      | <<br>0.0001 |
| A*D                         | 0.0303   | 29503.5<br>3 | <<br>0.0001 | 0.1140 | 52.35  | < 0.0001 | 0.0031        | 1319.7<br>4 | <<br>0.0001 |
| B*C                         | 0.0003   | 316.94       | <<br>0.0001 | 0.0207 | 9.50   | 0.0081   | 0.0017        | 747.17      | <<br>0.0001 |
| B*D                         | 0.0034   | 3323.50      | <<br>0.0001 | 0.1693 | 77.74  | < 0.0001 | 0.0027        | 1139.9<br>4 | <<br>0.0001 |
| C*D                         | 0.0093   | 9021.52      | <<br>0.0001 | 0.2991 | 137.31 | < 0.0001 | 0.0000        | 15.92       | 0.0013      |
| <b>Diagnosis Statistics</b> |          |              |             |        |        |          |               |             |             |
| Lack-of-Fit                 | 1.32e-06 | 4.53         | 0.0793      | 0.0028 | 4.60   | 0.08     | 2.824e-<br>06 | 2.56        | 0.1890      |
| R <sup>2</sup>              | 0.99     |              |             | 0.99   |        |          | 0.99          |             |             |
| R <sup>2</sup> Adjusted     | 0.99     |              |             | 0.97   |        |          | 0.99          |             |             |
| R <sup>2</sup><br>Predicted | 0.99     |              |             | 0.93   |        |          | 0.99          |             |             |
| Adequate<br>precision       | 339.42   |              |             | 36.42  |        |          | 147.66        |             |             |
| Mean                        | 0.26     |              |             | 2.86   |        |          | 0.49          |             |             |
| CV%                         | 0.39     |              |             | 1.63   |        |          | 0.31          |             |             |
| Std. Dev                    | 0.0010   |              |             | 0.0467 |        |          | 0.0015        |             |             |

**Supplementary Table S2.** Phytochemical content of chickpea beverage samples.

| Phytochemical                      | FCB                     | UFCB                    |
|------------------------------------|-------------------------|-------------------------|
| Chlorogenic acid                   | 10.30±0.05 <sup>a</sup> | 10.20±0.05 <sup>a</sup> |
| Biochanin A                        | 0.21±0.00 <sup>a</sup>  | 0.21±0.00 <sup>a</sup>  |
| Phenol-4-ethenyl-2,6-dimethoxy     | 0.26±0.00 <sup>a</sup>  | 0.33 ±0.00 <sup>b</sup> |
| Cinnam ic acid                     | 5.07±0.04 <sup>a</sup>  | 4.69±0.04 <sup>b</sup>  |
| Rosmarinic acid                    | 8.70±0.05 <sup>a</sup>  | 13.2 ±0.05 <sup>b</sup> |
| Stigmasterol                       | 4.67±0.04 <sup>a</sup>  | 2.41±0.03 <sup>b</sup>  |
| β-sitosterol                       | 14.70±0.05 <sup>a</sup> | 9.31±0.04 <sup>b</sup>  |
| Quinic acid                        | 10.69±0.01 <sup>a</sup> | 14.10±0.05 <sup>b</sup> |
| Salicylic acid                     | 0.69±0.01 <sup>a</sup>  | 0.68±0.01 <sup>a</sup>  |
| Caffeic acid                       | 0.84±0.01 <sup>a</sup>  | 0.85±0.01 <sup>a</sup>  |
| Tanshinone IIA                     | 0.11±0.00 <sup>a</sup>  | 0.11±0.00 <sup>a</sup>  |
| Protocatechuic acid                | 0.52±0.01 <sup>a</sup>  | 0.63±0.00 <sup>b</sup>  |
| Epicatechin gallate                | 0.43±0.01 <sup>a</sup>  | 0.44±0.01 <sup>a</sup>  |
| Salvianolic acid                   | 0.78±0.01 <sup>a</sup>  | 0.80±0.001 <sup>b</sup> |
| Glycyrrhetic acid                  | 0.11±0.00 <sup>a</sup>  | 0.11±0.01 <sup>a</sup>  |
| Ellagic acid                       | 1.00±0.00 <sup>a</sup>  | 1.29±0.02 <sup>b</sup>  |
| <b>Total phytochemical content</b> | <b>66.709</b>           | <b>64.51333</b>         |
